# Supplementary material
Source: PubMed Central journal article supplement (PMC2755877)

## SUPPLEMENTAL INFORMATION

### Identification of galacturonic acid-1-P kinase: a new member of the GHMP kinase super family in plants and comparison with galactose-1-P kinase

Ting Yang<sup>1</sup>, Liron Bar-Peled<sup>2</sup>, Lindsay Gebhart, Sung G Lee, and Maor Bar-Peled<sup>1,3</sup>

<sup>1</sup>Dept. of Biochemistry & Molecular Biology, Complex Carbohydrate Research Center (CCRC), and Plant Biology, University of Georgia, Athens, GA 30602

<sup>2</sup>Current address: Department of Biology, Massachusetts Institute of Technology (MIT), Cambridge, MA

<sup>3</sup>Address correspondences to: Maor Bar-Peled, CCRC 315 Riverbend Rd., Athens, GA 30602

Fax: 706-542-4412; Email: [peled@ccrc.uga.edu](mailto:peled@ccrc.uga.edu)

### Supplemental Figures

#### Supplemental Figure 1. Full <sup>1</sup>H-NMR spectrum of UDP-GalA derived from reaction products of GalAK.

A. Expanded proton NMR spectra that covers the sugar anomeric region (5.5-6 ppm).

B. Expanded view of the proton NMR spectra that covers the nucleotide-sugar carbon ring of UDP-GalA between 3.8 and 4.6 ppm.

#### Supplemental Figure 2. Full <sup>1</sup>H-NMR spectrum of UDP-Gal derived from reaction products of GalK.

A. Expanded proton NMR spectra that covers the sugar anomeric region (5.5-6 ppm).

B. Expanded view of the proton NMR spectra that covers the nucleotide-sugar carbon ring of UDP-Gal between 3.8 and 4.4 ppm.

#### Supplemental Figure 3. Expression and purification of recombinant wild type (wt) and mutants of GalK.

Panel A. SDS-PAGE analyses of total soluble protein (S20) and inclusion bodies (P20) derived from cell expressing WT or mutant GalK altered in the following aa (<sup>E62A</sup>; <sup>Y262F</sup>; <sup>A437S</sup>; <sup>S206G</sup>). Panel B. SDS-PAGE analyses of column-purified wt and mutants GalK recombinant proteins.

#### Supplemental Figure 4. Expression and purification of recombinant wild type (wt) and mutants of GalAK.

Panel A. SDS-PAGE analyses of total soluble protein (S20) and inclusion bodies (P20) derived from cell expressing WT or mutant GalAK altered in the following aa (<sup>A41E</sup>; <sup>Y250F</sup>; <sup>A368S</sup>). Panel B. SDS-PAGE analyses of column-purified wt and mutants GalAK recombinant proteins.

#### Supplemental Figure 5. Selected portions of the <sup>1</sup>H-NMR spectra corresponding to $\alpha$ -GalA and $\beta$ -GalA peaks before and during GalAK conversion of $\alpha$ -GalA to $\alpha$ -GalA-1-P.

A. Portions of the <sup>1</sup>H-NMR spectrum (no enzyme) showing the anomeric proton (H-1) of  $\alpha$ -GalA (5.27 ppm), the anomeric proton (H-1) of the  $\beta$ -GalA (4.55 ppm), and the H-5 peak of  $\beta$ -GalA (4.03 ppm). D-GalA (2 mM) was mixed with 50 mM phosphate buffer (pH/pD = 7.6), 5 mM MgCl<sub>2</sub> and D<sub>2</sub>O and monitored continuously by <sup>1</sup>H-NMR spectroscopy. The spectra shown were obtained after 2, 6, and 20 min.

B. After ~ 20 min, ATP (2 mM) was added and monitored continuously by <sup>1</sup>H-NMR spectroscopy. The spectra shown (+ATP) were obtained after 2, 6, and 20 min. The panels are showing no change in the  $\alpha$

and  $\beta$  configuration at time 2, 6, and 20 min post addition of ATP. NOTE: signal from the ribose protons (H-2', 3') of ATP are overlap with H-1 of  $\beta$ -GalA ( $\beta$ 1).

C. After ~ 20 min in the presence of ATP, the recombinant kinase (GalAK, 3  $\mu$ g) was added and the reaction monitored continuously by  $^1\text{H-NMR}$  spectroscopy. The spectra shown (+ enzyme) were obtained after 2, 6, and 20 min, and show the enzymatic phosphorylation of the  $\alpha$ -GalA configuration and its conversion to  $\alpha$ -GalA-1-P.

Abbreviation of the NMR spectrum are as follows:  $\alpha$ 1, peak corresponding to H-1 of  $\alpha$ -GalA (5.27 ppm);  $\beta$ 1, peak corresponding to H-1 of  $\beta$ -GalA (4.55 ppm);  $\beta$ 5, peak corresponding to H-5 of  $\beta$ -GalA (4.03 ppm);  $\alpha$ 1P, peak corresponding to H-1 of  $\alpha$ -GalA-1-P, (5.52 ppm). Note the  $\beta$ 1 peaks in panels B, overlap with ribose protons of ATP; the  $\beta$ 1 peaks in panels C, overlap with the ribose protons from ADP/ATP thus creating additional shift when compared with B.

**Supplemental Figure 6. Selected portions of the  $^1\text{H-NMR}$  spectra corresponding to  $\alpha$ -Gal and  $\beta$ -Gal peaks before and during GalK conversion of  $\alpha$ -Gal to  $\alpha$ -Gal-1-P.**

A. Portions of the  $^1\text{H-NMR}$  spectrum (no enzyme) showing the anomeric proton (H-1) of  $\alpha$ -Gal (5.24 ppm), the anomeric proton (H-1) of the  $\beta$ -Gal (4.56 ppm), and the H-4 peak of  $\beta$ -Gal (3.90 ppm). D-Gal (2 mM) was mixed with 50 mM phosphate buffer (pH/pD = 7.6), 5 mM  $\text{MgCl}_2$  and  $\text{D}_2\text{O}$  and monitored continuously by  $^1\text{H-NMR}$  spectroscopy. The spectra shown were obtained after 2, 6, and 20 min.

B. After ~ 20 min, ATP (2 mM) was added and monitored continuously by  $^1\text{H-NMR}$  spectroscopy. The spectra shown (+ATP) were obtained after 2, 6, and 20 min. The panels are showing no change in the  $\alpha$  and  $\beta$  configuration at time 2, 6, and 20 min post addition of ATP. NOTE: signal from the ribose protons (H-2', 3') of ATP are overlap with H-1 of  $\beta$ -Gal ( $\beta$ 1).

C. After ~ 20 min in the presence of ATP, the recombinant kinase (GalK, 3  $\mu$ g) was added and the reaction monitored continuously by  $^1\text{H-NMR}$  spectroscopy. The spectra shown (+ enzyme) were obtained after 2, 6, and 20 min, and show the enzymatic phosphorylation of the  $\alpha$ -Gal configuration and its conversion to  $\alpha$ -Gal-1-P.

Abbreviation of the NMR spectrum are as follows:  $\alpha$ 1, peak corresponding to H-1 of  $\alpha$ -Gal (5.24 ppm);  $\beta$ 1, peak corresponding to H-1 of  $\beta$ -Gal (4.56 ppm);  $\beta$ 4, peak corresponding to H-4 of  $\beta$ -Gal (3.90 ppm);  $\alpha$ 1P, peak corresponding to H-1 of  $\alpha$ -Gal-1-P, (5.47 ppm). Note the  $\beta$ 1 peaks in panels B, overlap with ribose protons of ATP; the  $\beta$ 1 peaks in panels C, overlap with the ribose protons from ADP/ATP thus creating additional shift when compared with B.

Supplemental Figure 1

A.

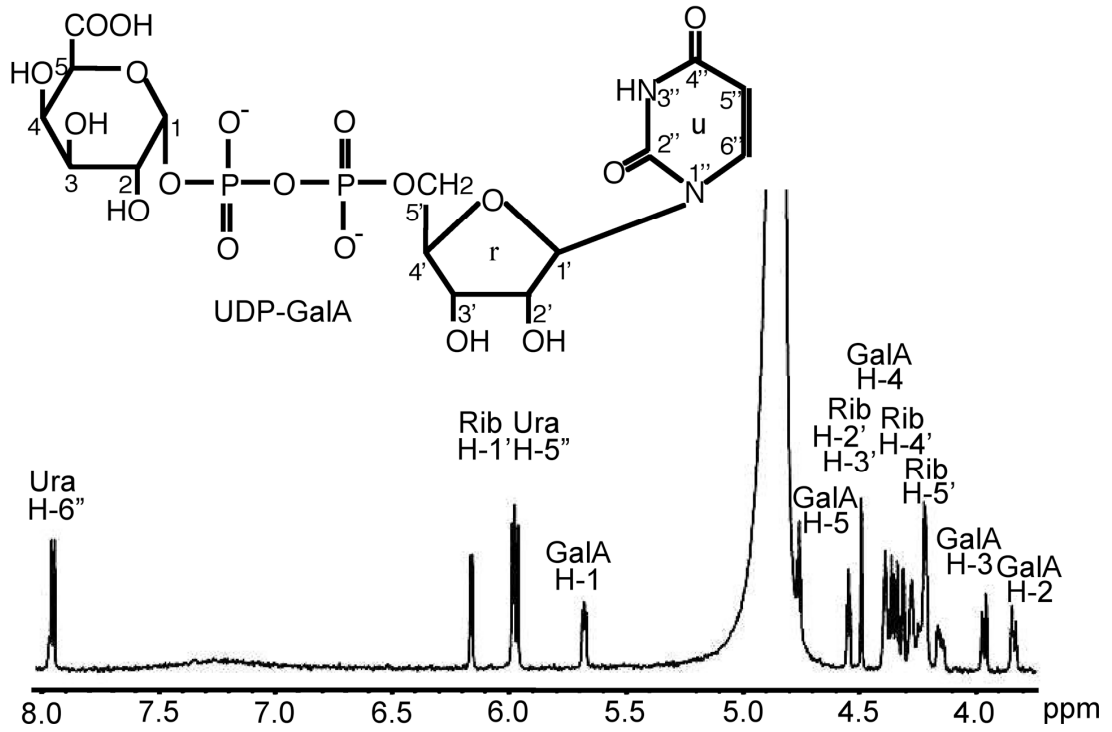

B.

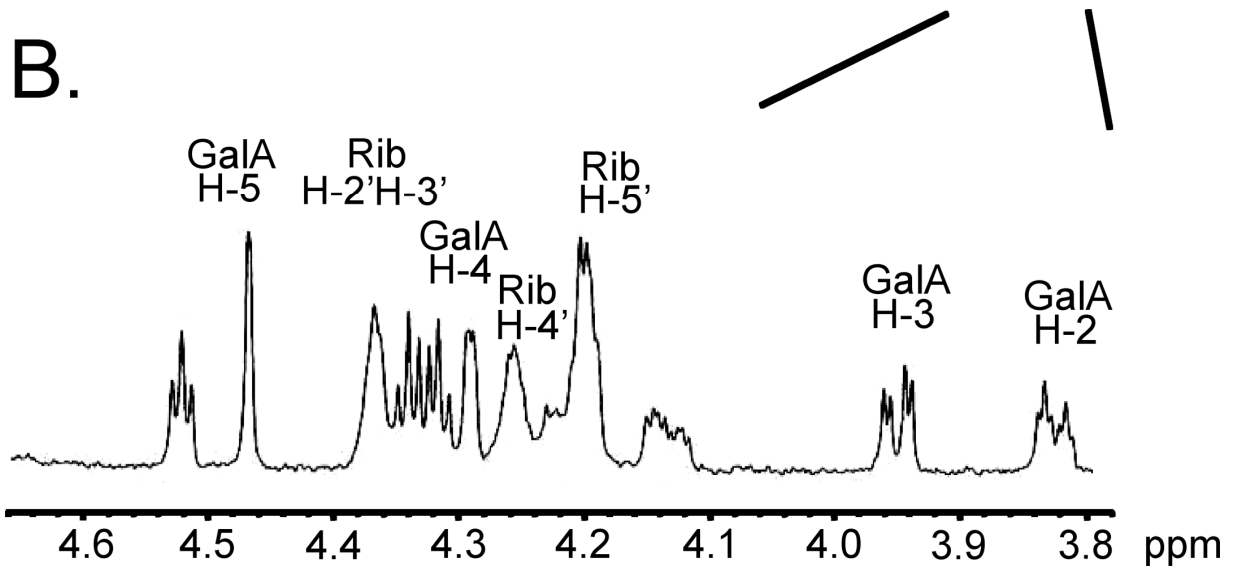

Yang *et al.* 2009

Supplemental Figure 2

A.

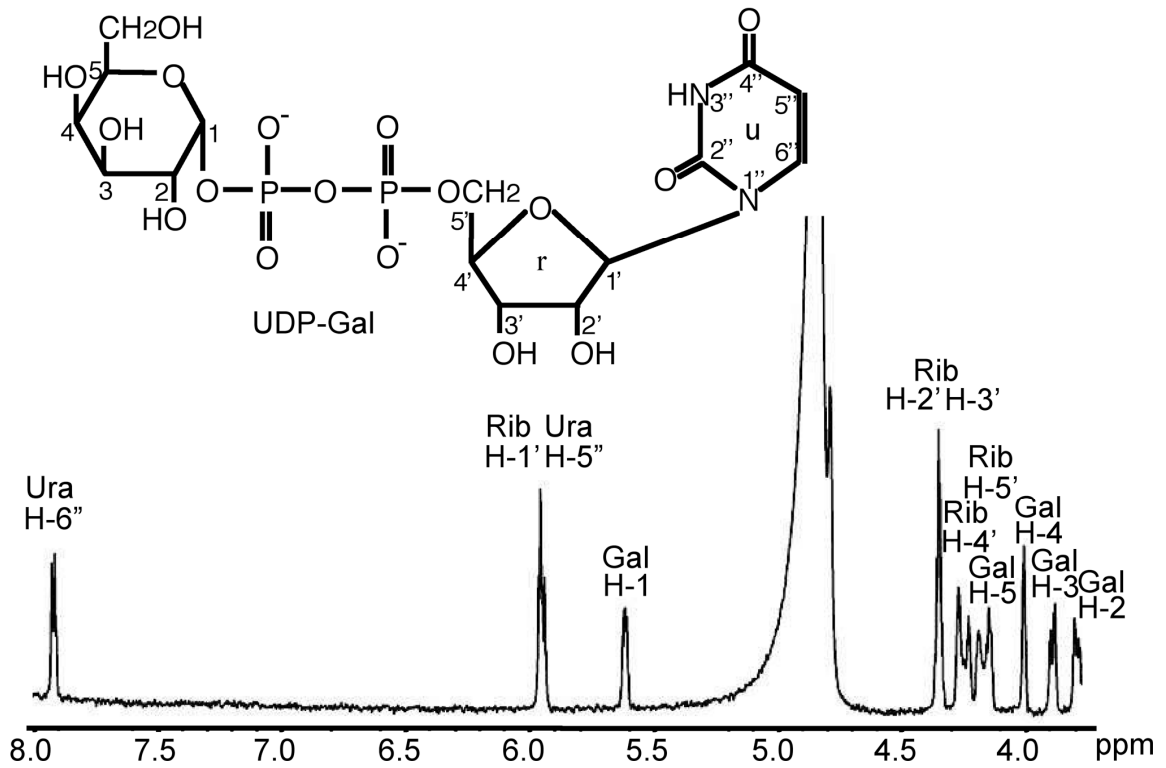

B.

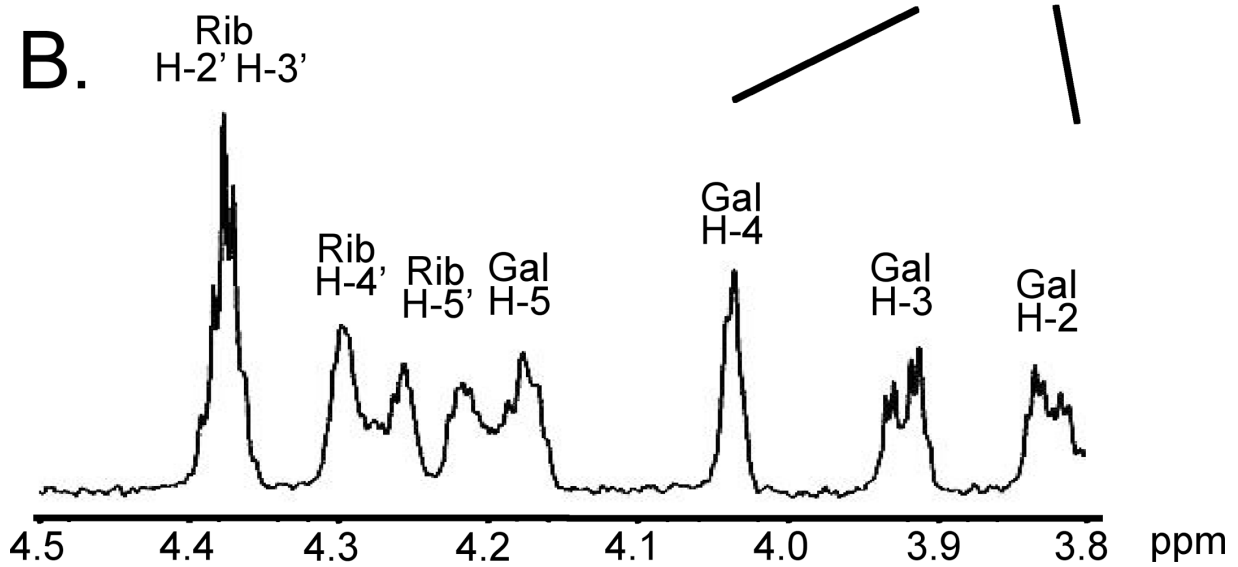

Yang *et al.* 2009

Supplemental Figure 3

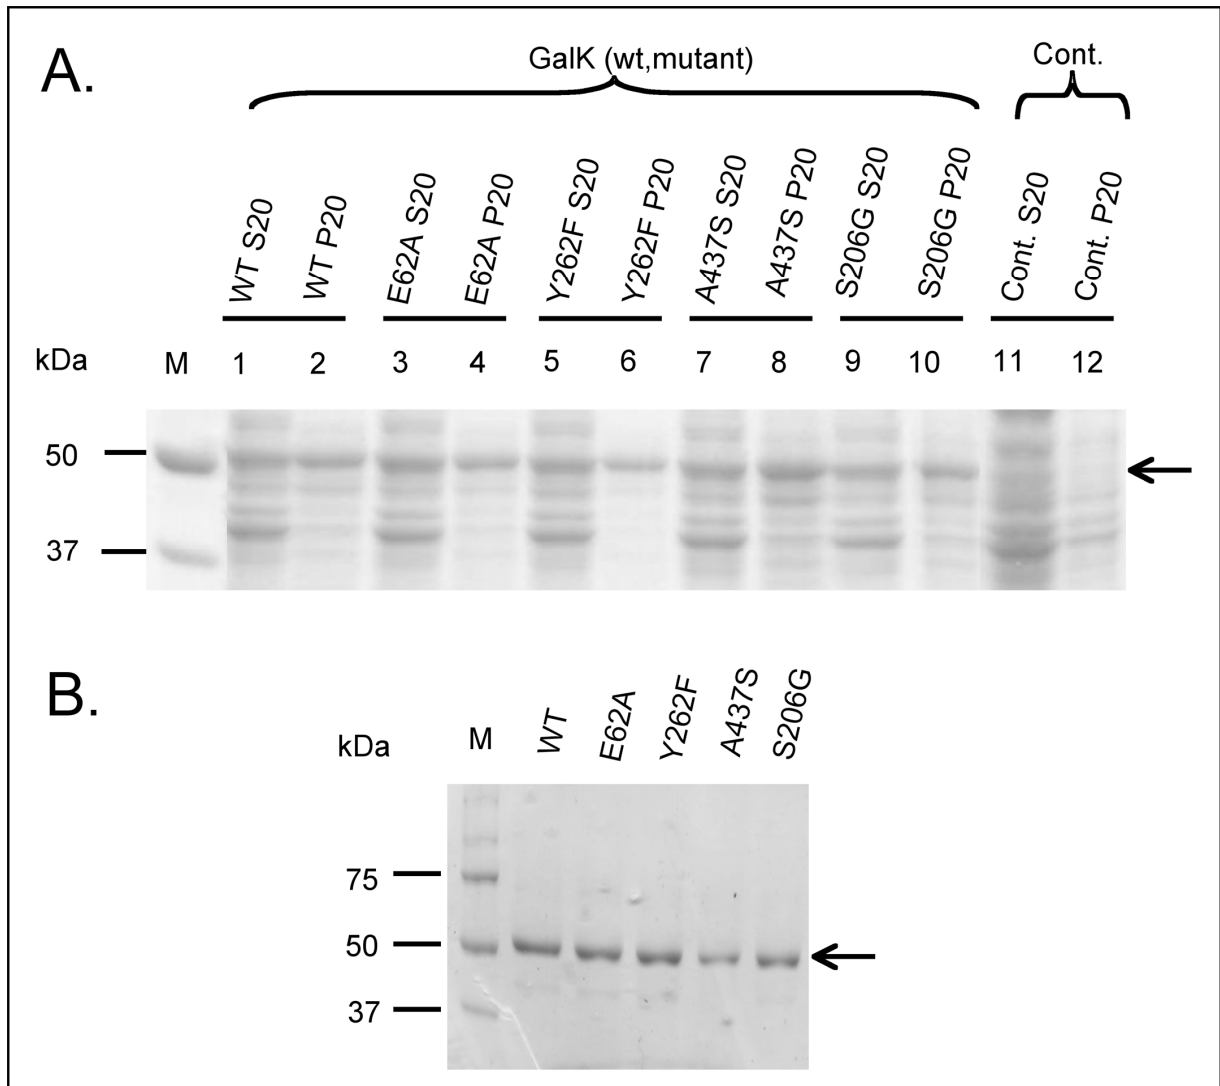

Yang *et al.* 2009

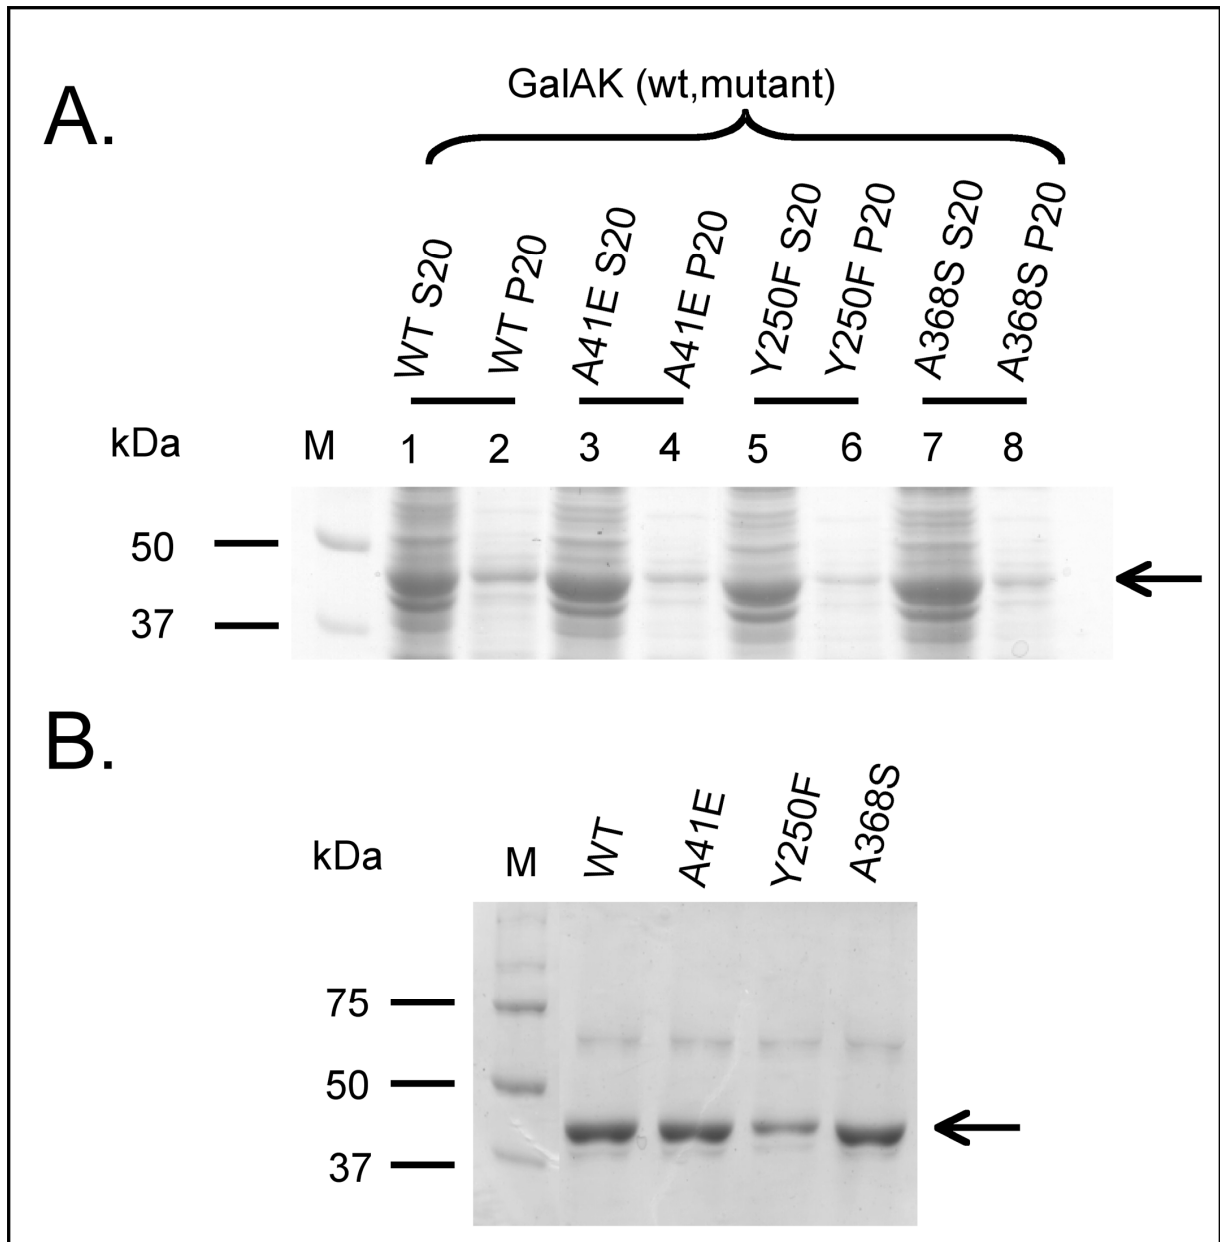

### GalAK Assay

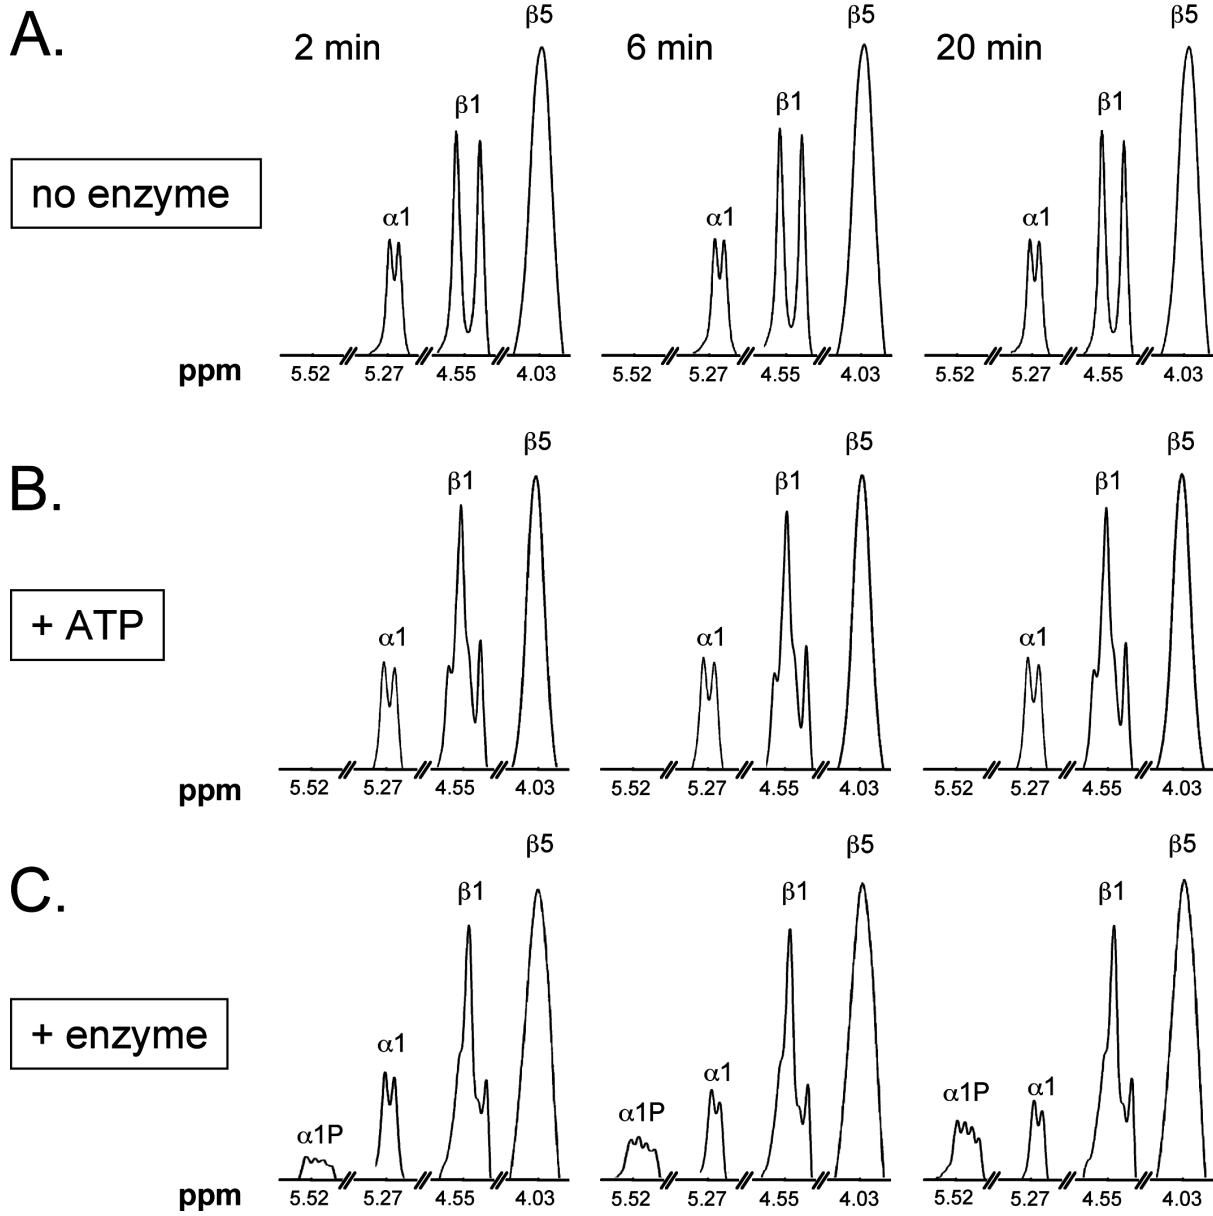

### Galk Assay

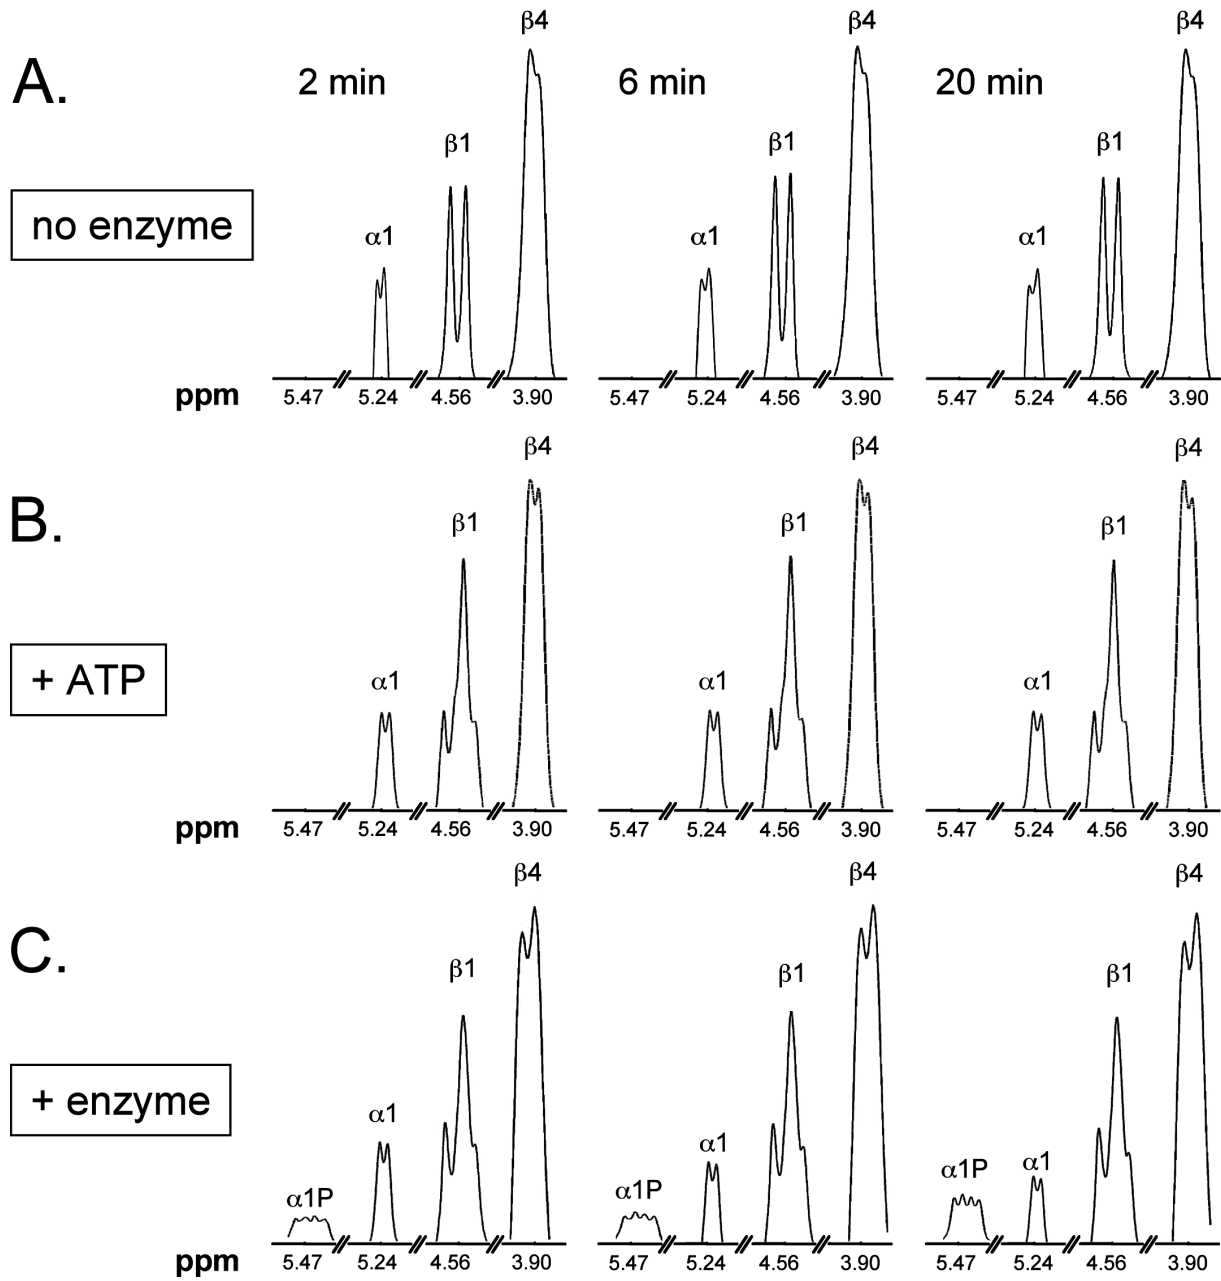

Supplement: supp_M109.014761_jbc.M109.014761-1.pdf [file supp_M109.014761_jbc.M109.014761-1.pdf]
